# Supplementary material for: Improving the high-voltage high-rate performance of a P2 layered oxide cathode by a dual-ion doping strategy for sodium-ion batteries
Source: Royal Society of Chemistry journal article supplement (doi:10.1039/d4ta03250k), 2024-01-01
Supplement: d4ta03250k1.pdf [file d4ta03250k1.pdf]

ARTICLE

Electronic Supporting Information (ESI)

**Improving high-voltage high-rate performance of P2 layered oxide cathode by dual-ion doping strategy for sodium-ion batteries**

Huan Xu<sup>a</sup>, Chengde Xie<sup>a</sup>, Huige Chen<sup>b</sup>, Tianyi Song<sup>a</sup>, Yuanqi Lan<sup>a,c</sup>, Nanzhong Wu<sup>a, c</sup>, Xiaolong Zhou<sup>a</sup>, Pinit Kidkhunthod<sup>d</sup>, Lei Kang<sup>b</sup>, Xiaoqi Han<sup>a</sup>, Wenjiao Yao<sup>a, c, e\*</sup>, Yongbing Tang<sup>a, c \*</sup>

---

<sup>a</sup>.Advanced Energy Storage Technology Research Center, Shenzhen Key Laboratory of Energy Materials for Carbon Neutrality, Shenzhen Institute of Advanced Technology, Chinese Academy of Sciences, Shenzhen, 518055, China. Email: wj.yao@siat.ac.cn, tangyb@siat.ac.cn

<sup>b</sup>. Functional Crystals Lab, Technical Institute of Physics and Chemistry, Chinese Academy of Sciences, Beijing 100190, China

<sup>c</sup>. Shenzhen College of Advanced Technology, University of Chinese Academy of Sciences, Beijing 100049, China

<sup>d</sup>. Synchrotron Light Research Institute, Nakhon Ratchasima 30000, Thailand.

<sup>e</sup>. Shenzhen Key Laboratory of Energy Materials for Carbon Neutrality, Shenzhen 518055, China

**Experiment Section:***Material synthesis:*

All samples in this study were synthesized by the high-temperature solid-state method. A detailed preparation process is included in the following. Pristine  $\text{P2-Na}_{2/3}\text{Ni}_{1/3}\text{Mn}_{2/3}\text{O}_2$  samples were synthesized by mixing stoichiometrically  $\text{Na}_2\text{CO}_3$  (AR, Sigma-Aldrich),  $\text{NiO}$  (AR, Sigma-Aldrich), and  $\text{MnO}_2$  (AR, Sigma-Aldrich) in the mortar with moderate amounts of ethanol, ball-milling for 300 min at a rate of 350 r/min. The mixture was then pressed into pellets of 10-mm diameter and sintered in a Muffle furnace at  $900^\circ\text{C}$  for 10 h. Final samples were obtained after grinding. The doping samples were acquired by the same steps but adjusting reactants stoichiometrically, with additional  $\text{TiO}_2$  (AR, Sigma-Aldrich), and/or  $\text{NaF}$  (AR, Sigma-Aldrich) in the original ingredients.

*Material characterization:*

Powder XRD patterns were collected by a Rigaku diffractometer (MiniFlex600) with  $\text{Cu K}\alpha$  radiation ( $\lambda = 0.154056$  nm). Scans were taken from  $10$ – $90^\circ$  with a  $2\theta$  step of  $0.02^\circ$ . Rietveld method was used to refine the data sets using the GSAS package incorporated with the EXPGUI interface<sup>[1]</sup>. Parameters, such as scale factor, background, lattice parameters, and zero point were refined until convergence. In-situ XRD patterns were recorded on a SmartLab operated at 40 kV and 15 mA using  $\text{Cu K}\alpha$  radiation in the  $2\theta$  range  $5$ – $90^\circ$  equipped with a battery test system (NEWARE CT-4008). Scanning electron microscope (SEM) measurements and energy dispersion X-ray spectra (EDS) element mapping of the samples were carried out on ZEISS SUPRA 55 equipped with an EDS analyzer. Transmission electron microscope (TEM) was conducted by a JEOL JEM-F200 field emission TEM equipped with an Oxford Instruments EDS analyzer. The chemical composition of the obtained materials was performed by inductively coupled plasma-atomic emission spectroscopy (ICP-AES, PE optima 6000). X-ray photoelectron spectroscopy (XPS) measurements were performed using a Thermo Escalab 250Xi X-ray photoelectron spectrometer (Thermo, USA). Raman spectra were carried out using HORIBA, XploRA PLUS detector in the backscattering mode at the  $400$ – $2000$   $\text{cm}^{-1}$  frequency range. The wave number resolution and probe aperture are  $1$   $\text{cm}^{-1}$  and about  $10$   $\mu\text{m}$ , respectively. Synchrotron X-ray absorption spectroscopies (XAS) experiments were conducted at the Ni K-edge ( $8333$  eV), Mn K-edge ( $6539$  eV) and Ti K-edge ( $4966$  eV) on SUT-NANOTEC-SLRI XAS beamline (BL5.2), Synchrotron Light Research Institute (SLRI, public organization), Thailand. The beamline photo source covers an energy range of  $1810$  eV to  $13000$  eV, with an energy resolution of  $2 \times 10^{-4}$ . Data were acquired in fluorescence mode using Si drift detector. Spectra were obtained at room temperature. XAS data were processed and analyzed using the Demeter software package<sup>[2]</sup>.

*First-principles calculation:*

The present first-principles calculations were performed by the plane-wave ultrasoft pseudopotential method using CASTEP based on the density functional theory (DFT) [3–5]. The simulation models for this study were the P2-Na<sub>16</sub>Ni<sub>4</sub>Mn<sub>8</sub>O<sub>24</sub> and P2-Na<sub>16</sub>Ni<sub>4</sub>Mn<sub>5</sub>Ti<sub>3</sub>O<sub>23</sub>F structures. The exchange and correlation energy were treated using the local density approximation (LDA, CA-PZ) functional. A cutoff energy of 280 eV was selected for the plane-wave basis set. The Monkhorst-Pack k-point density with 3×2×1 was used in the Brillouin zone [6]. Spin-polarization was employed throughout all calculations. The convergence criteria of energy, force, stress, and displacement were respectively set as  $5.0 \times 10^{-5}$  eV per atom, 0.1 eV Å<sup>-1</sup>, 0.2 GPa, and  $5.0 \times 10^{-3}$  Å, respectively. The complete linear synchronous transit/quadratic synchronous transit (LST/QST) method was used to calculate the Na diffusion energy barriers in P2-NNM and the P2-NNMT0.1-F0.05 composites [7].

#### *Electrochemical measurement:*

Cathode electrodes were prepared by casting the slurry (80 wt.% active material, 10 wt.% super P, 10 wt.% polyvinylidene fluoride (PVDF, AR, Sigma-Aldrich) and an appropriate amount of N-methyl-2-pyrrolidone (NMP, Sigma-Aldrich) onto aluminum foil and dried in a vacuum at 80°C for overnight. The loading mass of the active material is about 2 mg cm<sup>-2</sup>. The hard carbon anode was prepared in a similar way but on a copper foil.

The CR2032 coin cells were assembled in a glove box filled with Ar (H<sub>2</sub>O and O<sub>2</sub> < 0.1 ppm). Pure Na foil was used as a counter electrode and a glass fiber (Whatman GF/A) was used as the separator. The electrolyte was 1 M NaClO<sub>4</sub> (AR, Sigma-Aldrich) in propylene carbonate (PC, AR, Sigma-Aldrich) with 5 vol% fluoroethylene carbonate (FEC, AR, Sigma-Aldrich). Galvanostatic charge-discharge (GCD) and rate performance tests were carried out on a test system (NEWARE CT-4008). The current densities and capacities of electrodes were calculated based on the weight of active materials (1C = 173 mA g<sup>-1</sup>). Cyclic voltammetry (CV) and electrochemical impedance spectroscopy (EIS) tests were measured on an electrochemical workstation (AUTOLAB M204). CV tests were performed in the voltage range of 1.5 V–4.3 V and 2.3 V–4.3 V vs. Na<sup>+</sup>/Na at the scan rates from 0.1 to 1.0 mV s<sup>-1</sup>. Full cells were assembled in the same way as half-coin cells but changed the Na foil to pre-sodiated hard carbon anode, and the N/P is about 1.2. The specific capacity and energy density of the full cell are calculated based on the active mass of the cathode material.

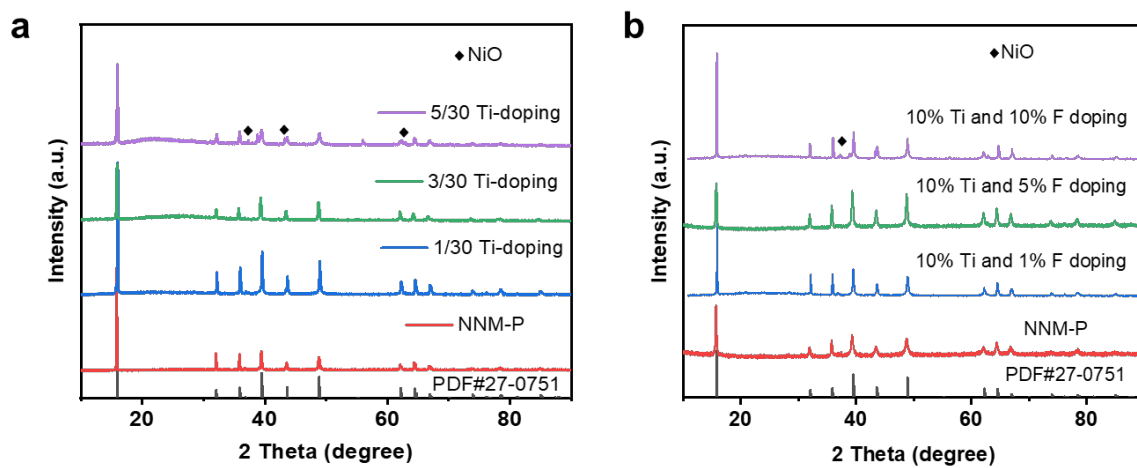

**Figure S1** XRD comparison of different Ti or/and F-substituted  $\text{Na}_{2/3}\text{Ni}_{1/3}\text{Mn}_{2/3-x}\text{Ti}_x\text{O}_{2-y}\text{F}_y$  ( $x = 0, 1/30, 3/30, 5/30, y = 0, 0.01, 0.05, 0.1$ ) cathode materials.

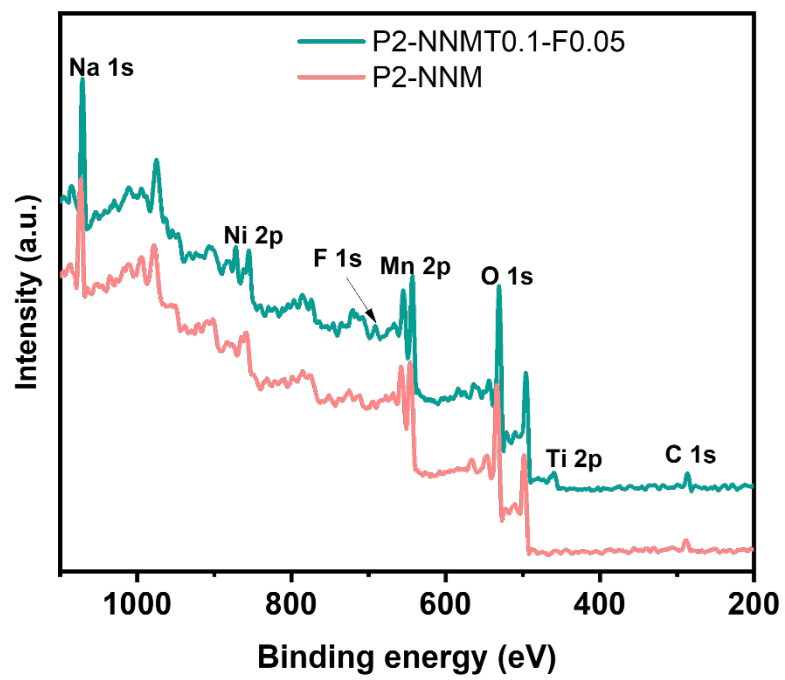

**Figure S2.** XPS overall map of pristine and Ti and F doping P2-NNM samples.

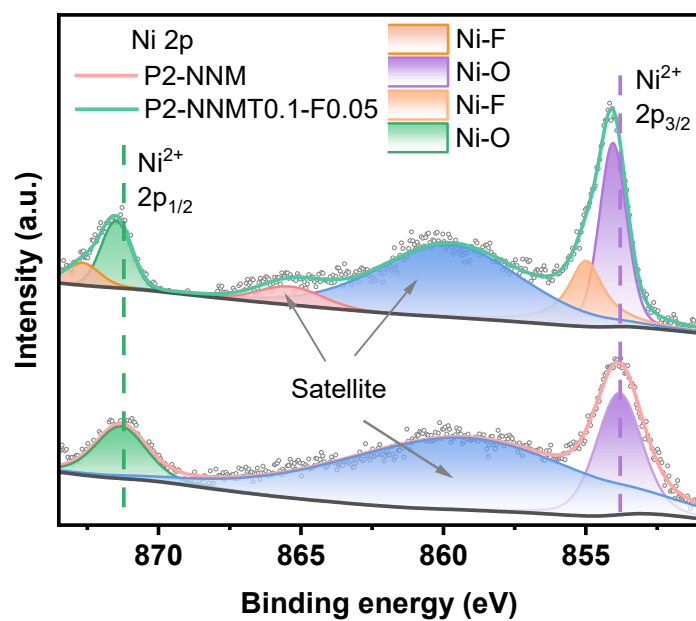

**Figure S3.** Ni 2p fitting results of pristine and Ti and F doping P2-NNM samples.

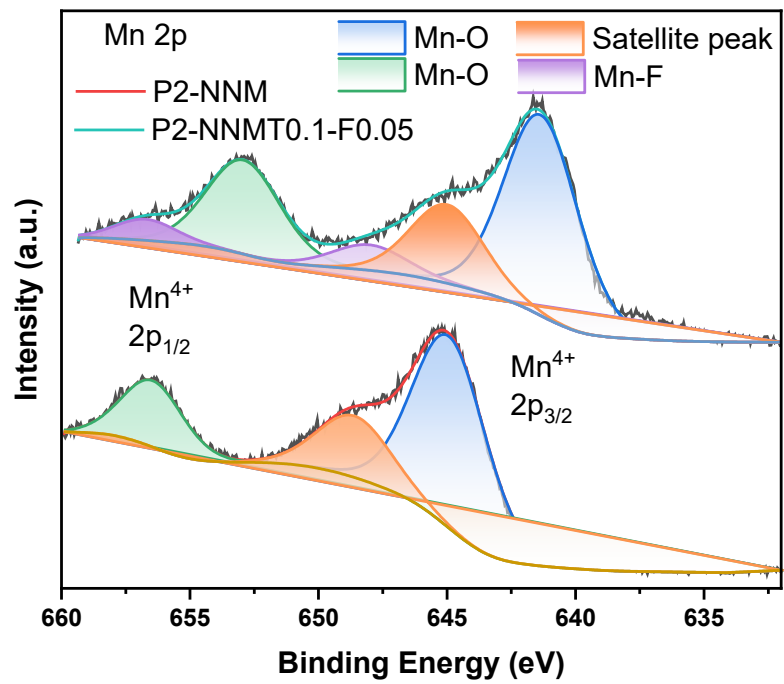

**Figure S4.** Mn 2p fitting results of pristine and Ti and F doping P2-NNM samples.

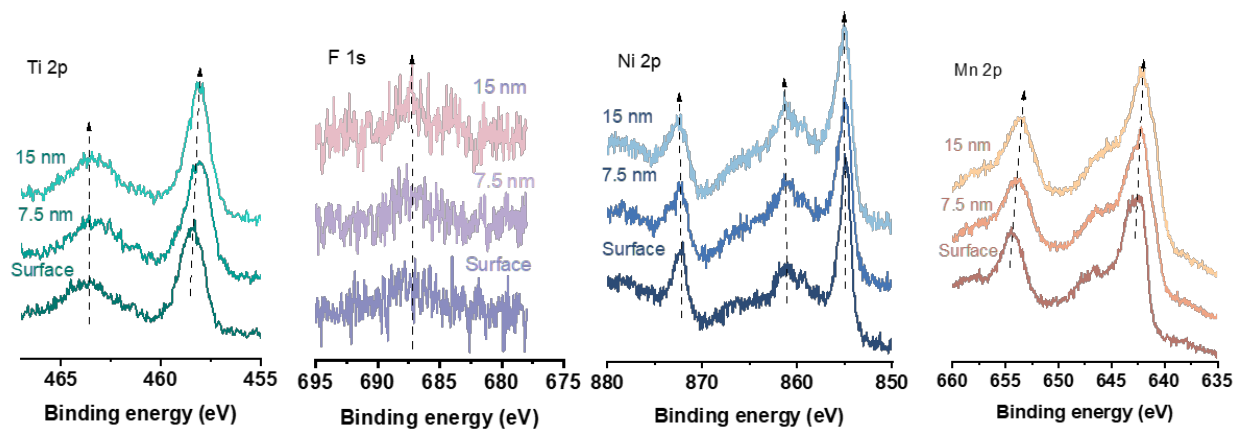

**Figure S5.** XPS with different etching depth of Ti 2p, F 1s, Ni 2p, Mn 2p Ti and F doping P2-NNM sample.



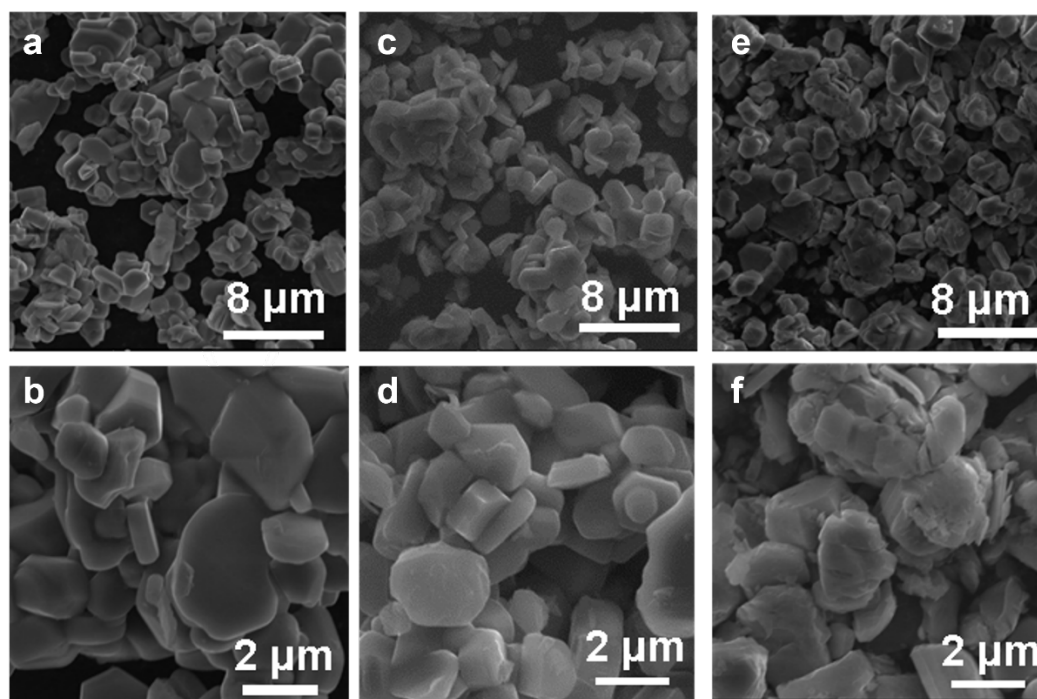

**Figure S6.** SEM images of different F doping samples. (a-b) 1% F. (c-d) 5% F. (e-f) 10% F.

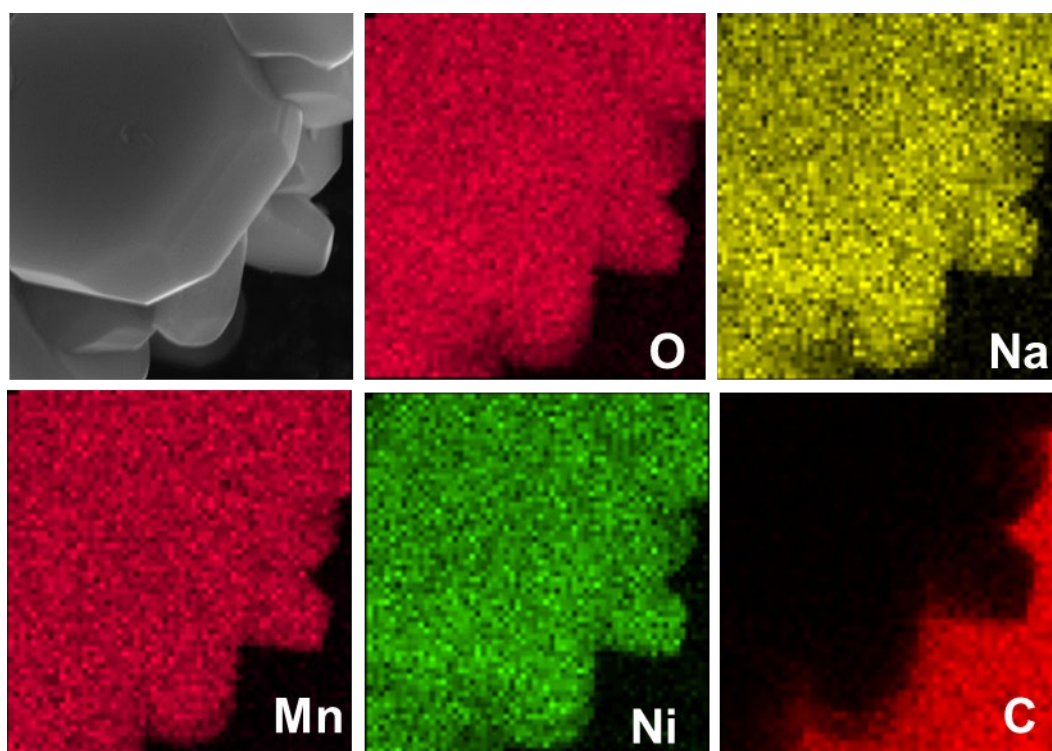

**Figure S7.** EDS mapping of P2-NNM sample.

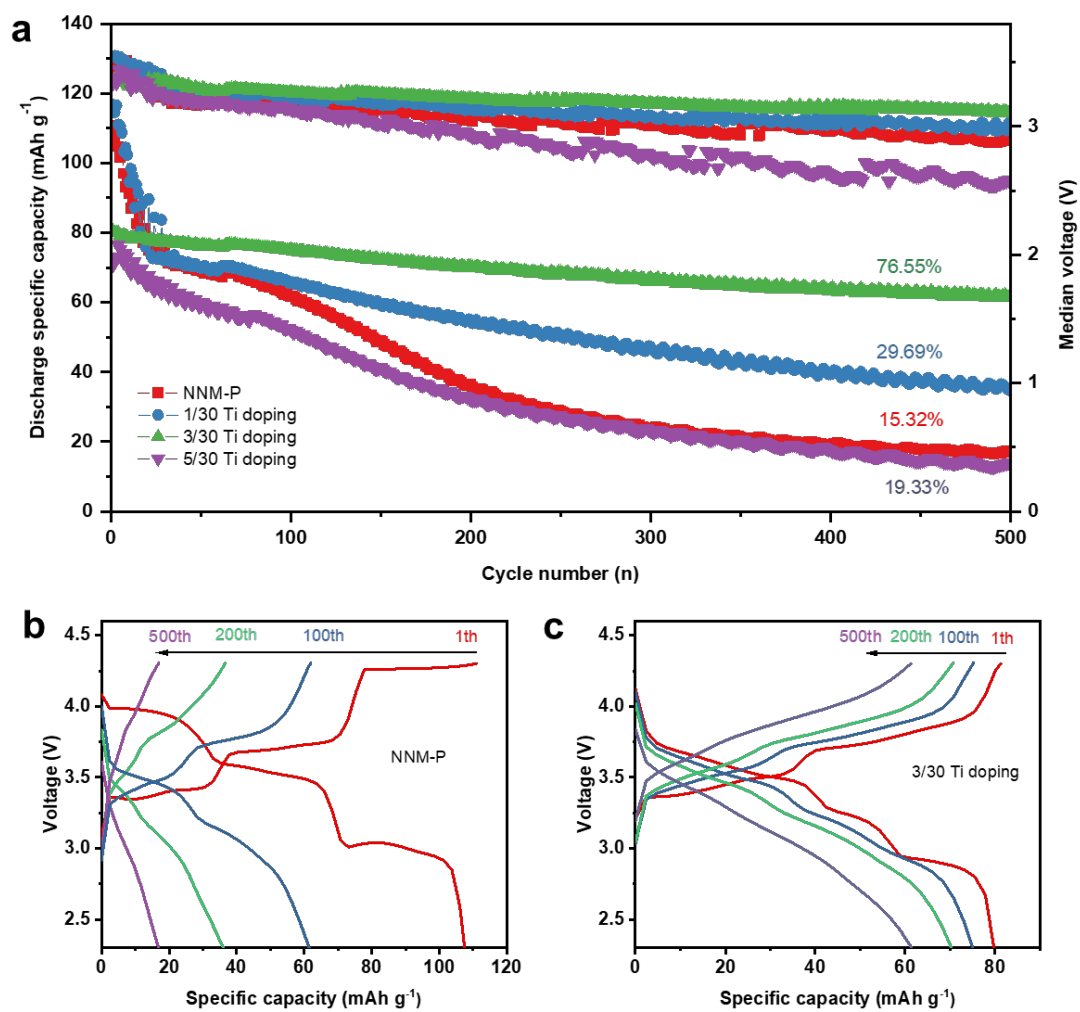

**Figure S8.** (a) Long cycle performance of different amount of Ti doping at 5C. (b) Charge-discharge curve for pristine NNM. (c) Charge-discharge curve for NNM with 3/30 Ti doping.

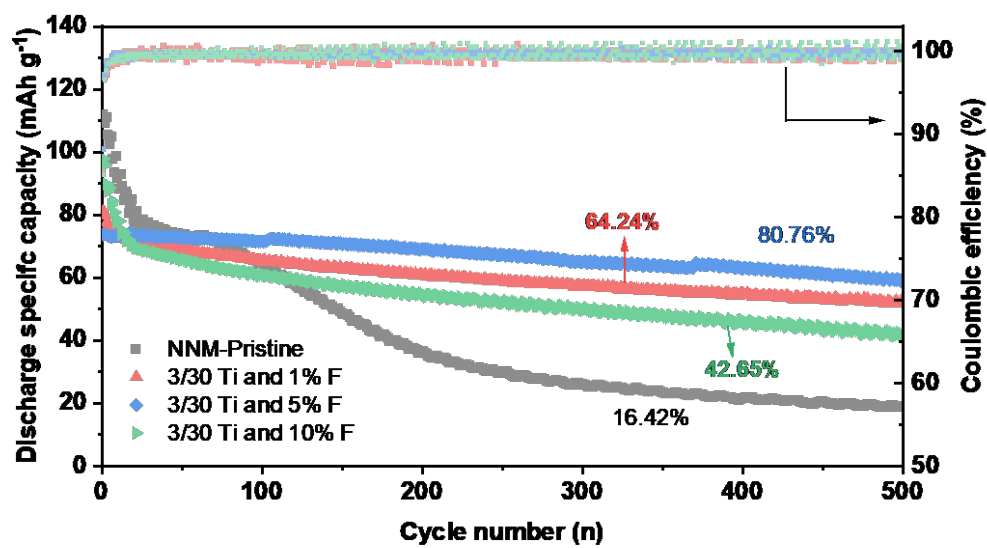

Figure S9. Cycle performance of NNM pristine and 10% Ti and different F doping (1%, 5%, 10%) samples.

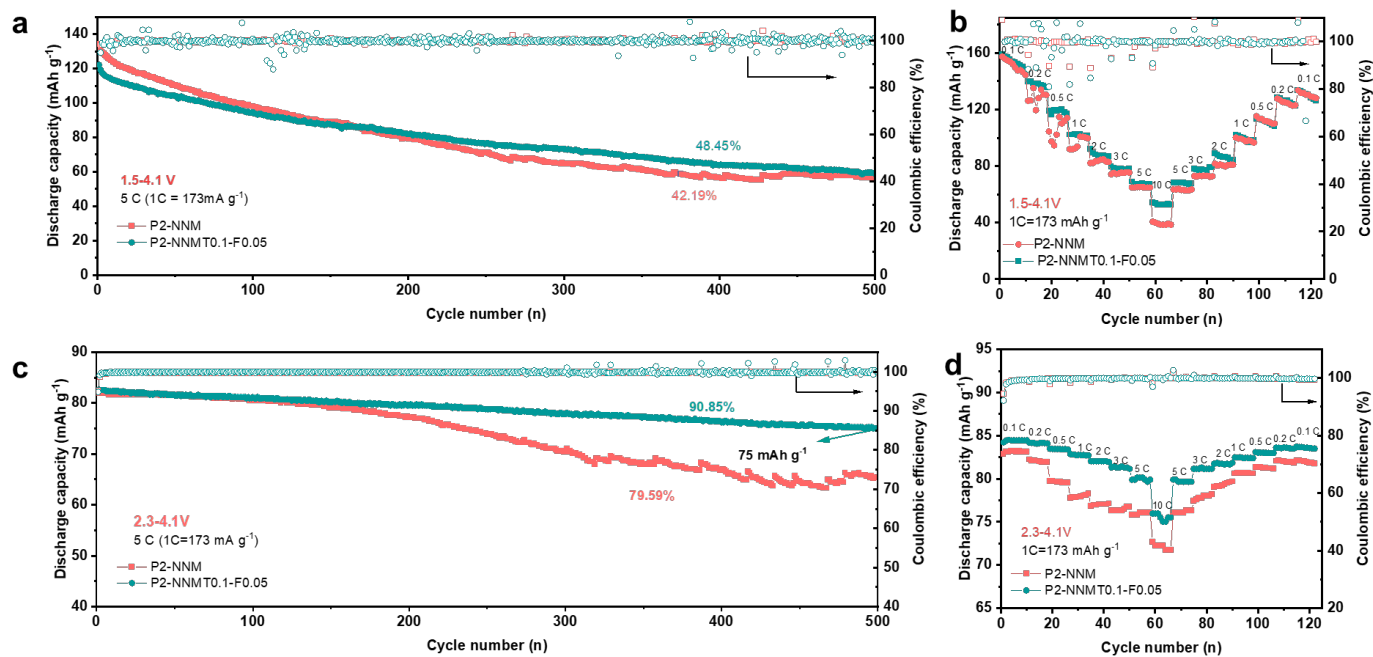

**Figure S10.** (a) Cycle performance at 1.5-4.1 V. (b) Rate performance at 1.5-4.1 V. (c) Cycle performance at 2.3-4.1 V of pristine NNM and 10% Ti and 5% F co-doping samples.

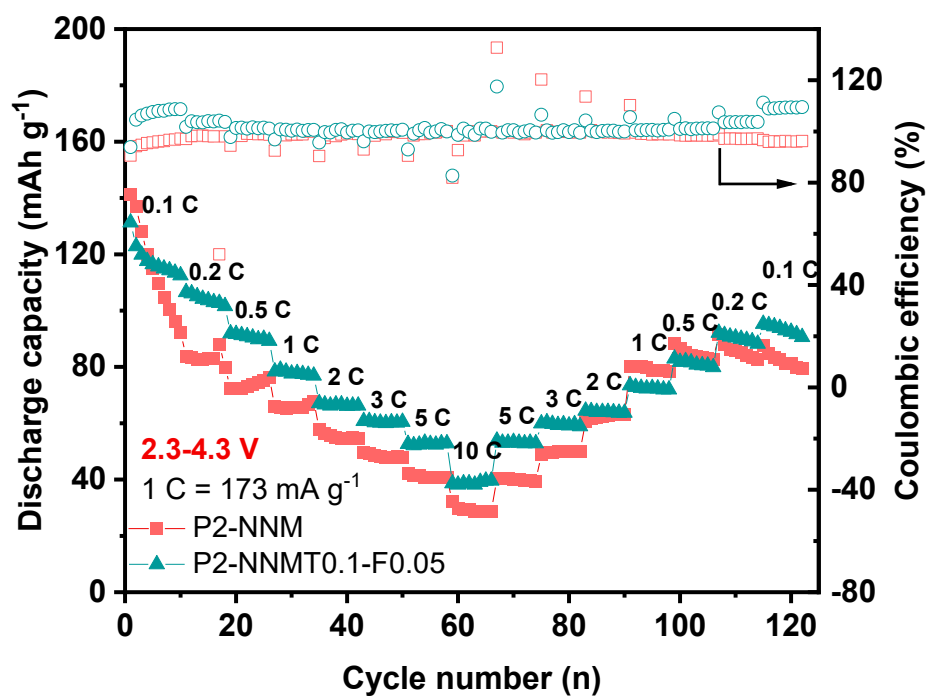

Figure S11. Rate performance at 2.3-4.3 V.

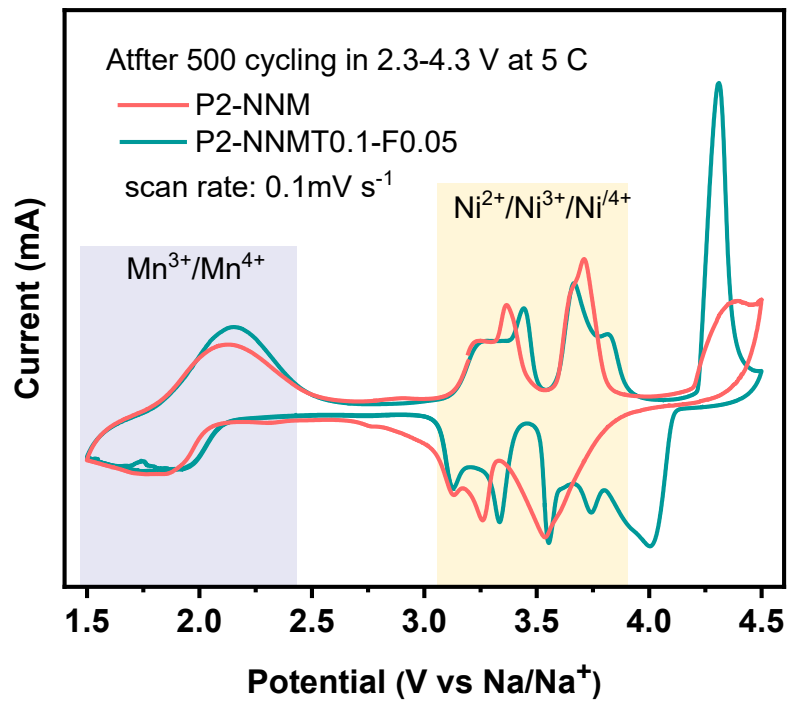

**Figure S12.** CV curves of NNM pristine and Ti and F co-doping samples at 1.5-4.5 V.

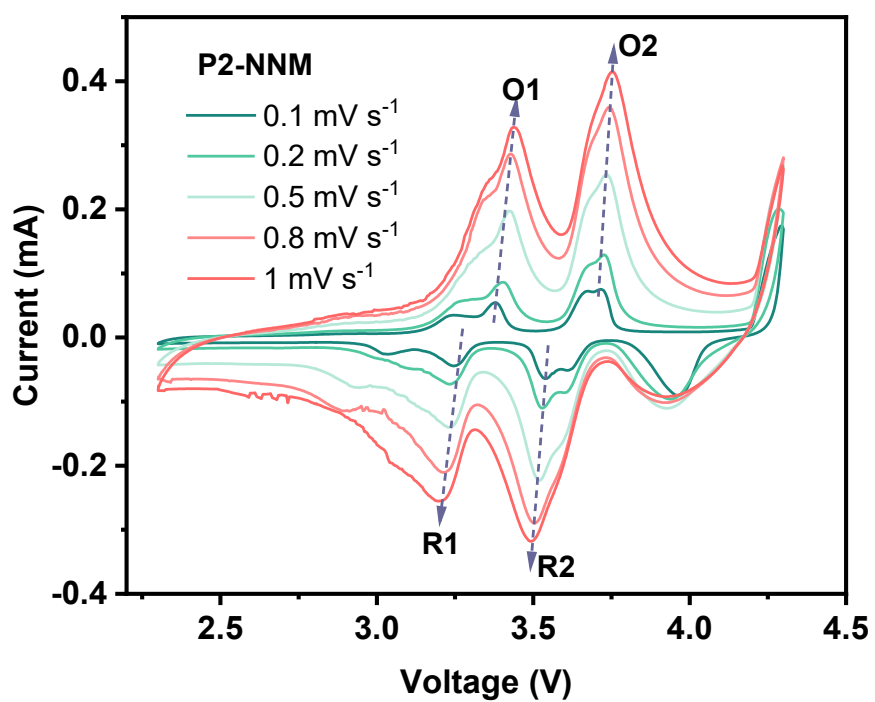

Figure S13. CV curves of P2-NNM at different scan rates from 0.1 to 1.0 mV s<sup>-1</sup>.



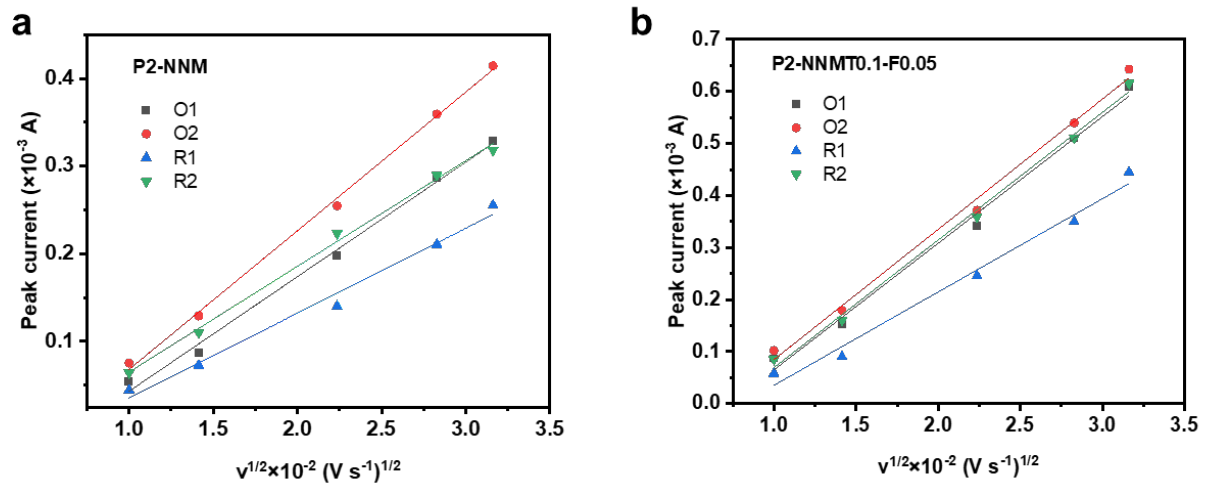

**Figure S14.** the corresponding fitting curves between peak currents ( $i_p$ ) and the square root of scan rates ( $v^{1/2}$ ) of (a) P2-NNM. (b) P2-NNMT0.5-F0.05.

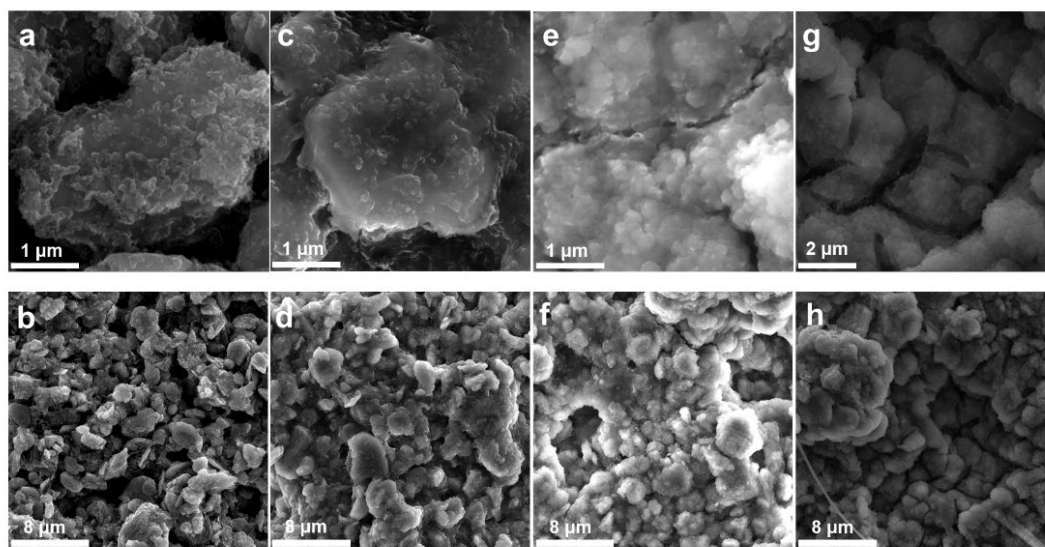

**Figure S15.** SEM images of NNM-Pristine samples before and after cycling at 5C in different voltage ranges. (a-b) before cycling, (c-d) 2.3-4.1 V, (e-f) 1.5-4.1 V, (g-h) 2.3-4.3 V.

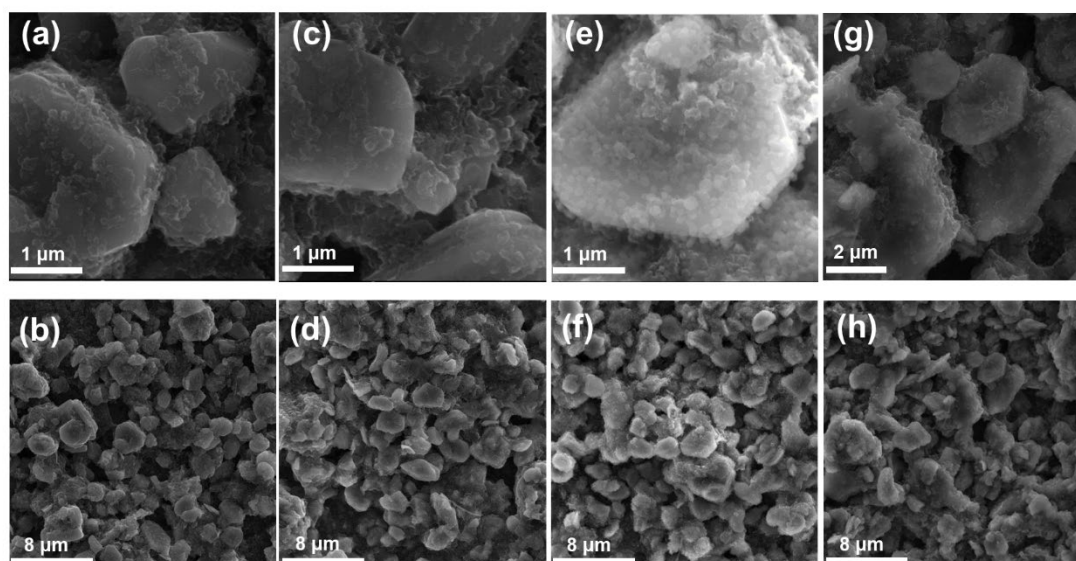

**Figure S16.** SEM images of 10% Ti and 5% F co-doping samples before and after cycling at 5C in different voltage ranges. (a-b) before cycling. (c-d) 2.3-4.1 V. (e-f) 1.5-4.1 V. (g-h) 2.3-4.3 V.

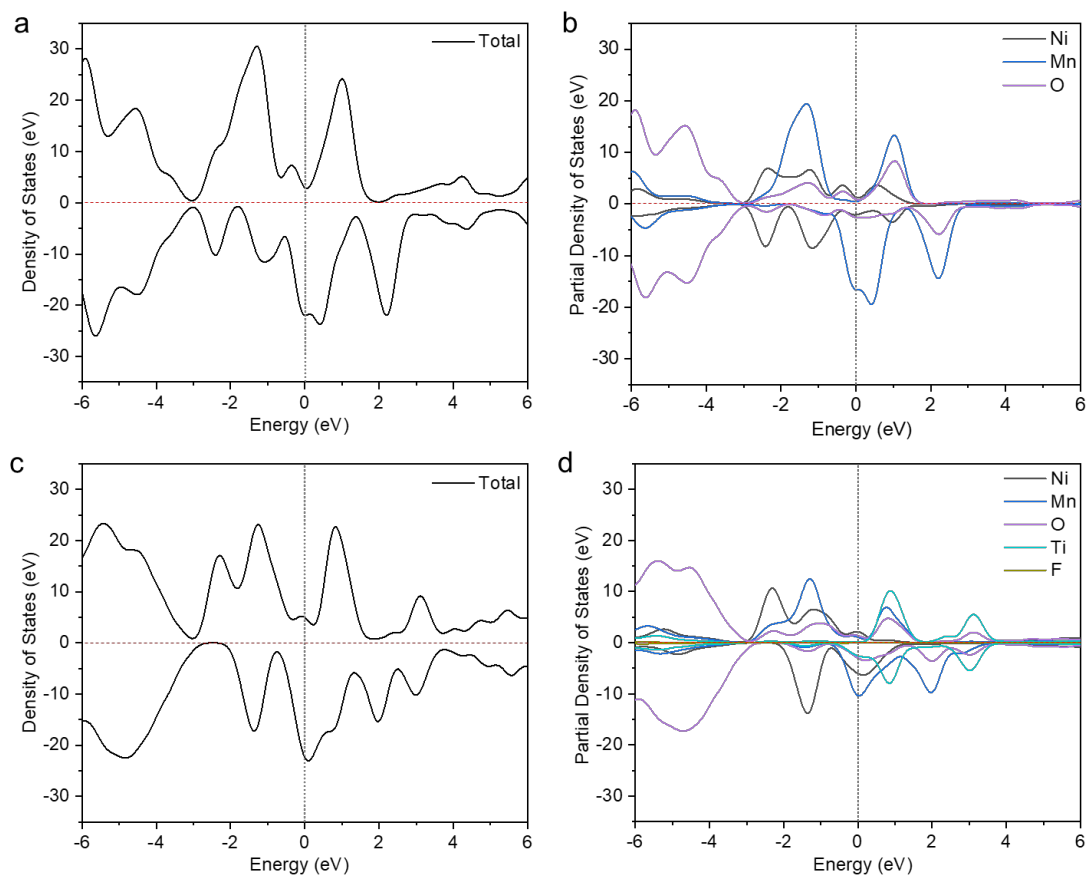

**Figure S17.** (a) The total density of state of pristine sample. (b) Partial density of states (pDOS) of O 2p, Mn 3d, and Ni 3d orbitals of pristine sample. (c) The total density of state of Ti and F doping sample. (d) pDOS of O 2p, Mn 3d, and Ni 3d orbitals of Ti and F doping sample.

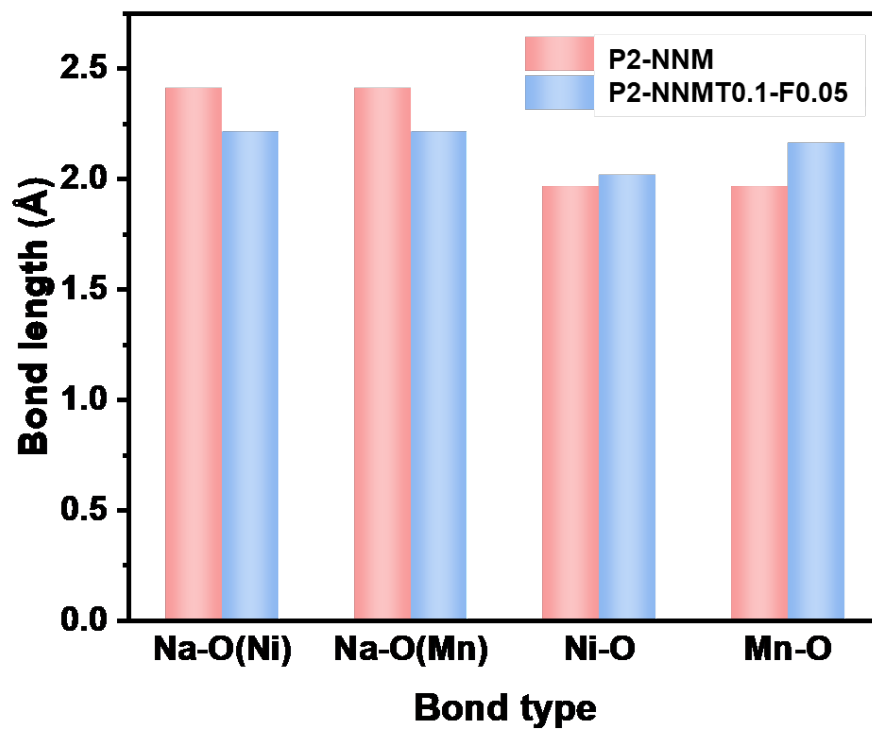

**Figure S18.** Comparison of the average bond lengths in the pristine P2-NNM and P2-NNMT0.1-F0.05.

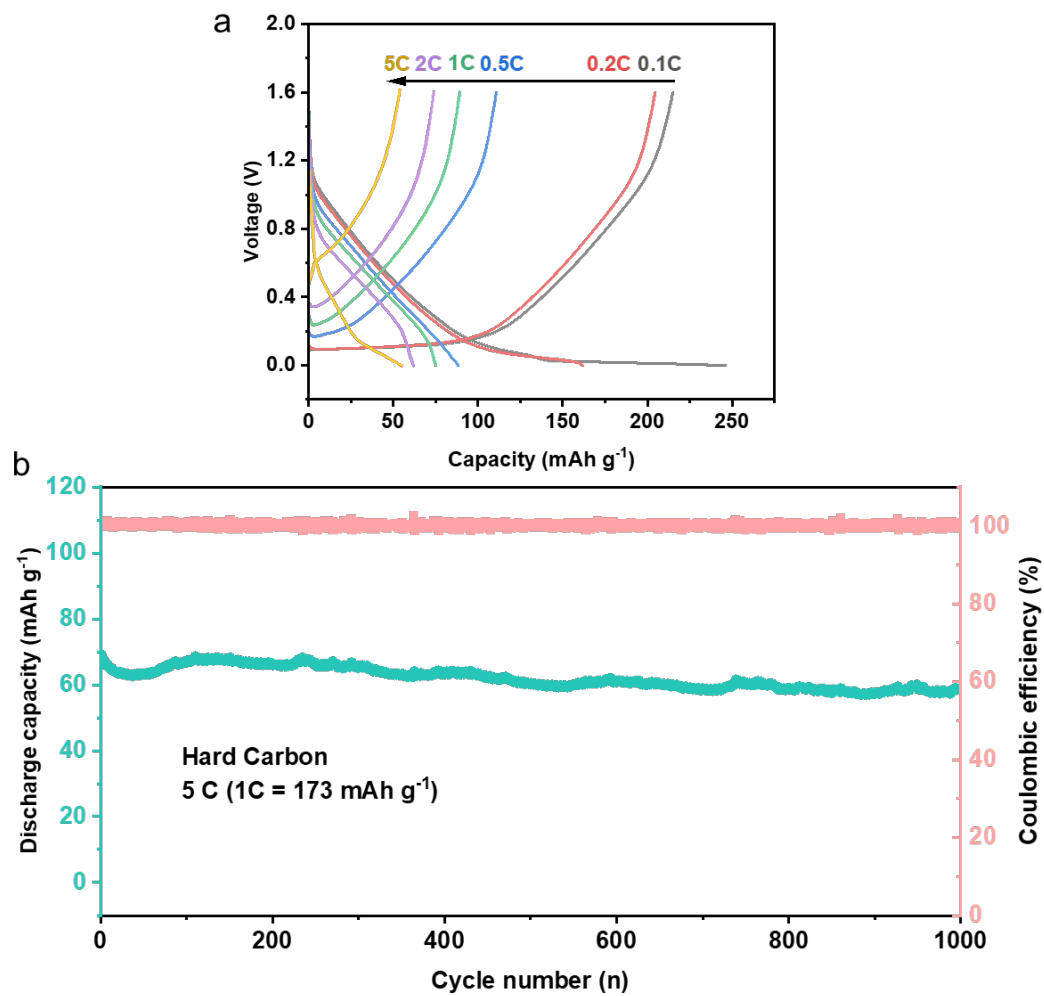

**Figure S19.** Performance of the hard carbon half cell. (a) Charge-discharge curves at different rate. (b) Cycle performance.

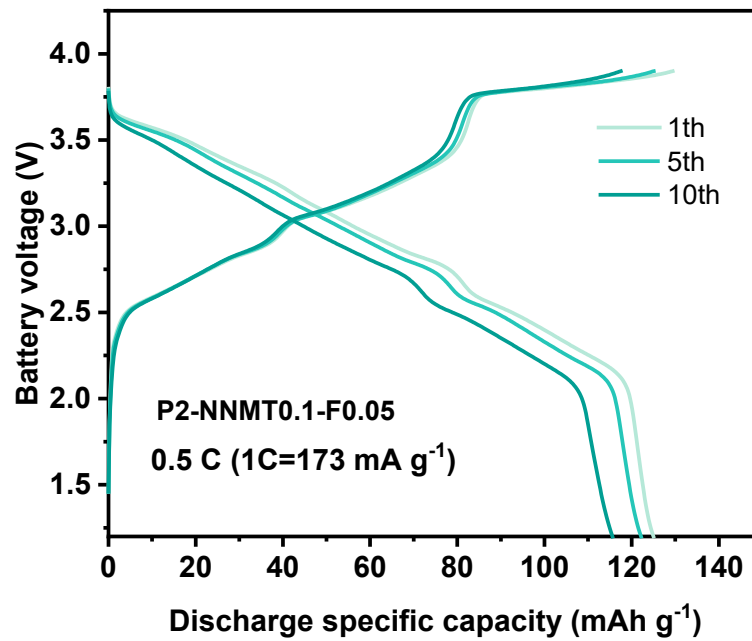

**Figure S20.** Charge-discharge curves of different cycling of the P2-NNMT0.5-F0.05//hard carbon full cell.

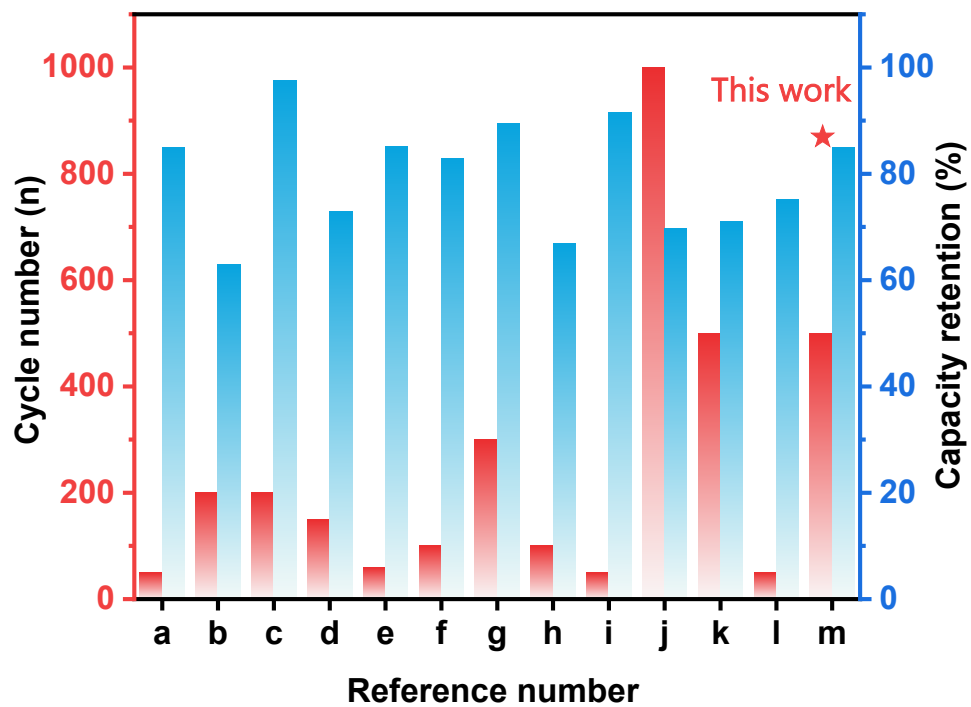

**Figure S21.** Comparison of the performance of Na-ion full cell (“a” to “m” are extracted sequentially from ref. [8–18]).



**Table S1.** ICP test results of NNM-Pristine and Ti and F co-doping sample

| Chemical formula                                                                                |               | Measured atomic ratio |      |      |      |
|-------------------------------------------------------------------------------------------------|---------------|-----------------------|------|------|------|
|                                                                                                 |               | Na                    | Ni   | Mn   | Ti   |
| $\text{Na}_{0.67}\text{Ni}_{0.33}\text{Mn}_{0.67}\text{O}_2$                                    | theoretically | 0.67                  | 0.33 | 0.67 |      |
|                                                                                                 | actually      | 0.64                  | 0.32 | 0.68 |      |
| $\text{Na}_{0.67}\text{Ni}_{0.33}\text{Mn}_{0.57}\text{Ti}_{0.1}\text{O}_{1.95}\text{F}_{0.05}$ | theoretically | 0.67                  | 0.33 | 0.57 | 0.1  |
|                                                                                                 | actually      | 0.72                  | 0.33 | 0.58 | 0.09 |

**Table S2.** Main parameters of processing and refinement

| Compound          | P2-NNM     |
|-------------------|------------|
| Space group       | P 63/m m c |
| a, Å              | 2.88965(8) |
| b, Å              | 2.88965(8) |
| c, Å              | 11.1610(8) |
| alpha             | 90         |
| beta              | 90         |
| gamma             | 120        |
| V, Å <sup>3</sup> | 80.710(8)  |
| Rwp               | 0.09       |
| Rp                | 0.06       |
| Chi*2             | 4.03       |

**Table S3.** Fractional atomic coordinates and isotropic displacement parameters of P2-NNM-

|     | <b>x</b> | <b>y</b> | <b>z</b> | <b>Biso</b> |
|-----|----------|----------|----------|-------------|
| Na1 | 0.3333   | 0.6667   | 0.2500   | 0.01266     |
| Na2 | 0.0000   | 0.0000   | 0.2500   | 0.01266     |
| Ni  | 0.0000   | 0.0000   | 0.0000   | 0.01266     |
| Mn  | 0.0000   | 0.0000   | 0.0000   | 0.01266     |
| O   | 0.3333   | 0.6667   | 0.5938   | 0.01266     |

**Table S4.** Main parameters of processing and refinement

| Compound          | P2-NNMT0.1 |
|-------------------|------------|
| Space group       | P 63/mmc   |
| a, Å              | 2.90309(6) |
| b, Å              | 2.90309(6) |
| c, Å              | 11.1413(5) |
| alpha             | 90         |
| beta              | 90         |
| gamma             | 120        |
| V, Å <sup>3</sup> | 81.32(5)   |
| Rwp               | 0.11       |
| Rp                | 0.084      |
| Chi*2             | 2.81       |

**Table S5.** Fractional atomic coordinates and isotropic displacement parameters of P2-NNMT0.1

|     | <b>x</b> | <b>y</b> | <b>z</b> | <b>Biso</b> |
|-----|----------|----------|----------|-------------|
| Na1 | 0.3333   | 0.6667   | 0.2500   | 0.00500     |
| Na2 | 0.0000   | 0.0000   | 0.2500   | 0.00500     |
| Ni  | 0.0000   | 0.0000   | 0.0000   | 0.00500     |
| Mn  | 0.0000   | 0.0000   | 0.0000   | 0.00500     |
| O   | 0.3333   | 0.6667   | 0.5938   | 0.00500     |
| Ti  | 0.0000   | 0.0000   | 0.0000   | 0.00500     |

**Table S6.** Main parameters of processing and refinement

| Compound          | P2-NNMT0.5-F0.05 |
|-------------------|------------------|
| Space group       | P 63/m m c       |
| a, Å              | 2.92569(2)       |
| b, Å              | 2.92569(2)       |
| c, Å              | 11.2582(7)       |
| alpha             | 90               |
| beta              | 90               |
| gamma             | 120              |
| V, Å <sup>3</sup> | 83.45(6)         |
| Rwp               | 0.10             |
| Rp                | 0.08             |
| Chi*2             | 2.84             |

**Table S7.** Fractional atomic coordinates and isotropic displacement parameters of NNMT0.5-F0.05

|     | <b>x</b> | <b>y</b> | <b>z</b> | <b>Biso</b> |
|-----|----------|----------|----------|-------------|
| Na1 | 0.3333   | 0.6667   | 0.2500   | 0.11333     |
| Na2 | 0.0000   | 0.0000   | 0.2500   | 0.06208     |
| Ni  | 0.0000   | 0.0000   | 0.0000   | 0.01300     |
| Mn  | 0.0000   | 0.0000   | 0.0000   | 0.07717     |
| O   | 0.3333   | 0.6667   | 0.5938   | 0.03202     |
| Ti  | 0.0000   | 0.0000   | 0.0000   | 0.05000     |
| F   | 0.3333   | 0.6667   | 0.5938   | 0.05000     |

**Table S8.** Atomic in XPS at different etching depth of NNM-pristine samples

| <b>NNM-Pristine</b>   | <b>Na 1s<br/>Atomic (%)</b> | <b>Ni 2p<br/>Atomic (%)</b> | <b>Mn 2p<br/>Atomic (%)</b> | <b>O1s<br/>Atomic (%)</b> | <b>C1s<br/>Atomic (%)</b> |
|-----------------------|-----------------------------|-----------------------------|-----------------------------|---------------------------|---------------------------|
| <b>Not etching</b>    | 17.50                       | 7.07                        | 12.09                       | 51.36                     | 11.97                     |
| <b>Etching 7.5 nm</b> | 15.38                       | 8.95                        | 14.76                       | 55.01                     | 5.90                      |
| <b>Etching 15 nm</b>  | 13.19                       | 10.12                       | 17.03                       | 54.82                     | 4.83                      |
| <b>Standard</b>       | 18.25                       | 9.26                        | 18.25                       | 54.4                      | /                         |



**Table S9.** Atomic in XPS at different etching depth of 10% Ti doping and 5% F doping samples

| <b>10% Ti and<br/>5% F doping</b> | <b>Na 1s<br/>Atomic<br/>(%)</b> | <b>Ni 2p<br/>Atomic<br/>(%)</b> | <b>Mn 2p<br/>Atomic<br/>(%)</b> | <b>O1s<br/>Atomic<br/>(%)</b> | <b>C1s<br/>Atomic<br/>(%)</b> | <b>Ti 2p<br/>Atomic<br/>(%)</b> | <b>F 1s<br/>Atomic<br/>(%)</b> |
|-----------------------------------|---------------------------------|---------------------------------|---------------------------------|-------------------------------|-------------------------------|---------------------------------|--------------------------------|
| <b>Not etching</b>                | 20.50                           | 6.25                            | 9.91                            | 46.75                         | 12.39                         | 2.32                            | 1.90                           |
| <b>Etching 7.5<br/>nm</b>         | 19.94                           | 7.97                            | 12.49                           | 47.45                         | 7.67                          | 2.63                            | 1.86                           |
| <b>Etching 15<br/>nm</b>          | 17.66                           | 9.06                            | 14.75                           | 48.16                         | 5.68                          | 2.77                            | 1.92                           |
| <b>standard</b>                   | 18.13                           | 9.20                            | 15.3                            | 53.45                         | /                             | 2.7                             | 1.3                            |

**Table S10.** Cycling performance of layered oxide cathode in publications

| Chemical formula                                                                                               | Voltage window (V) | Cycle performance               | Reference |
|----------------------------------------------------------------------------------------------------------------|--------------------|---------------------------------|-----------|
| $\text{Na}_{2/3}\text{Ni}_{1/3}\text{Mn}_{2/3}\text{O}_2$                                                      | 1.5–4.5            | 75.3% after 200 cycles at 2 C   | [19]      |
| $\text{Na}_{0.76}\text{Ni}_{0.20}\text{Fe}_{0.40}\text{Mn}_{0.40}\text{O}_2$                                   | 1.5–4.5            | 73.5% after 100 cycles at 0.1 C | [20]      |
| P2- $\text{Na}_{0.55}[\text{Ni}_{0.1}\text{Fe}_{0.1}\text{Mn}_{0.8}]\text{O}_2$                                | 1.5–4.3            | 80% after 500 cycles at 5 C     | [21]      |
| ZrO <sub>2</sub> coating $\text{Na}_{2/3}\text{Ni}_{1/3}\text{Mn}_{2/3}\text{O}_2$                             | 2.0–4.5            | 77% after 200 cycles at 5 C     | [22]      |
| $\text{Na}_{2/3}\text{Li}_{1/6}\text{Fe}_{1/6}\text{Co}_{1/6}\text{Ni}_{1/6}\text{Mn}_{1/3}\text{O}_2$         | 2.0–4.5            | 63.7% after 300 cycles at 5 C   | [23]      |
| P2-type $\text{Ni}_{2/3}\text{Ni}_{1/4}\text{Mg}_{1/12}\text{Mn}_{2/3}\text{O}_2$                              | 2.0–4.3            | 68.9% after 1000 cycles at 5 C  | [9]       |
| hierarchical $\text{Na}_{2/3}\text{Ni}_{1/3}\text{Mn}_{2/3}\text{O}_2$ hollow microspheres                     | 2.5–4.2            | 83.3% after 500 cycles at 1 C   | [16]      |
| $\text{Na}_{2/3}\text{Ni}_{1/3}\text{Mn}_{2/3}\text{O}_{1.95}\text{F}_{0.05}$                                  | 2.0–4.0            | 75.6% after 2000 cycles at 10 C | [24]      |
| $\text{NaNi}_{0.45}\text{Cu}_{0.05}\text{Mn}_{0.4}\text{Ti}_{0.1}\text{O}_2$                                   | 2.0–4.0            | 70.2% after 500 cycles at 1 C   | [14]      |
| $\text{Na}_{0.696}\text{Ni}_{0.329}\text{Mn}_{0.671}\text{O}_2$                                                | 2.5–4.13           | 71.9% after 1000 cycles at 1 C  | [10]      |
| P2- $\text{Na}_{0.7}\text{Li}_{0.03}\text{Mg}_{0.03}\text{Ni}_{0.27}\text{Mn}_{0.6}\text{Ti}_{0.07}\text{O}_2$ | 2.2–4.1            | 82% after 200 cycles at 2 C     | [12]      |
| P2- $\text{Na}_{0.67}\text{Ni}_{0.33}\text{Mn}_{0.57}\text{Ti}_{0.1}\text{O}_{1.95}\text{F}_{0.05}$            | 2.3–4.3            | 80% after 500 cycles at 5 C     | This work |

## Reference:

- [1] B. H. Toby, R. B. Von Dreele, *J. Appl. Crystallogr.* **2013**, *46*, 544.
- [2] B. Ravel, M. Newville, *J. Synchrotron Radiat.* **2005**, *12*, 537.
- [3] A. M. Rappe, K. M. Rabe, E. Kaxiras, J. D. Joannopoulos, *Phys. Rev. B* **1990**, *41*, 1227.
- [4] M. C. Payne, M. P. Teter, D. C. Allan, T. A. Arias, J. D. Joannopoulos, *Rev. Mod. Phys.* **1992**, *64*, 1045.
- [5] S. J. Clark, M. D. Segall, C. J. Pickard, P. J. Hasnip, M. I. J. Probert, K. Refson, M. C. Payne, *Z. Für Krist. - Cryst. Mater.* **2005**, *220*, 567.
- [6] H. J. Monkhorst, J. D. Pack, *Phys. Rev. B* **1976**, *13*, 5188.
- [7] T. A. Halgren, W. N. Lipscomb, *Chem. Phys. Lett.* **1977**, *49*, 225.
- [8] Y. Liu, Q. Shen, X. Zhao, J. Zhang, X. Liu, T. Wang, N. Zhang, L. Jiao, J. Chen, L.-Z. Fan, *Adv. Funct. Mater.* **2020**, *30*, 1907837.
- [9] L. Zhang, C. Guan, Y. Xie, H. Li, A. Wang, S. Chang, J. Zheng, Y. Lai, Z. Zhang, *ACS Appl. Mater. Interfaces* **2022**, *14*, 18313.
- [10] S. Liu, J. Wan, M. Ou, W. Zhang, M. Chang, F. Cheng, Y. Xu, S. Sun, C. Luo, K. Yang, C. Fang, J. Han, *Adv. Energy Mater.* **2023**, *13*, 2203521.
- [11] Y. Li, S. Xu, X. Wu, J. Yu, Y. Wang, Y.-S. Hu, H. Li, L. Chen, X. Huang, *J. Mater. Chem. A* **2014**, *3*, 71.
- [12] Z. Cheng, B. Zhao, Y.-J. Guo, L. Yu, B. Yuan, W. Hua, Y.-X. Yin, S. Xu, B. Xiao, X. Han, P.-F. Wang, Y.-G. Guo, *Adv. Energy Mater.* **2022**, *12*, 2103461.
- [13] M.-Y. Shen, J.-S. Wang, Z. Ren, T. Wu, X. Liu, L. Chen, W.-C. Li, A.-H. Lu, *Adv. Funct. Mater.* **n.d.**, *n/a*, 2303812.
- [14] K. Liu, S. Tan, J. Moon, C. J. Jafta, C. Li, T. Kobayashi, H. Lyu, C. A. Bridges, S. Men, W. Guo, Y. Sun, J. Zhang, M. P. Paranthaman, X.-G. Sun, S. Dai, *Adv. Energy Mater.* **2020**, *10*, 2000135.
- [15] Y.-F. Zhu, Y. Xiao, S.-X. Dou, S.-L. Chou, *Cell Rep. Phys. Sci.* **2021**, *2*, 100631.
- [16] J. Liang, Z. Li, J. Cheng, J. Qin, H. Liu, D. Wang, *Nano Res.* **2023**, *16*, 4987.
- [17] Y.-N. Zhou, Z. Xiao, D. Han, S. Wang, J. Chen, W. Tang, M. Yang, L. Shao, C. Shu, W. Hua, D. Zhou, Y. Wu, *J. Mater. Chem. A* **2023**, *11*, 2618.
- [18] R. Dong, F. Wu, Y. Bai, Q. Li, X. Yu, Y. Li, Q. Ni, C. Wu, *Energy Mater. Adv.* **2022**, *2022*, 9896218.
- [19] X. Xia, T. Liu, C. Cheng, H. Li, T. Yan, H. Hu, Y. Shen, H. Ju, T. Chan, Z. Wu, Y. Su, Y. Zhao, D. Cao, L. Zhang, *Adv. Mater.* **2023**, *35*, 2209556.
- [20] A. K. Paidi, W. B. Park, P. Ramakrishnan, S.-H. Lee, J.-W. Lee, K.-S. Lee, H. Ahn, T. Liu, J. Gim, M. Avdeev, M. Pyo, J. I. Sohn, K. Amine, K.-S. Sohn, T. J. Shin, D. Ahn, J. Lu, *Adv. Mater.* **2022**, *34*, 2202137.
- [21] J.-Y. Hwang, J. Kim, T.-Y. Yu, Y.-K. Sun, *Adv. Energy Mater.* **2019**, *9*, 1803346.
- [22] H. Ren, L. Zheng, Y. Li, Q. Ni, J. Qian, Y. Li, Q. Li, M. Liu, Y. Bai, S. Weng, X. Wang, F. Wu, C. Wu, *Nano Energy* **2022**, *103*, 107765.
- [23] L. Yao, P. Zou, C. Wang, J. Jiang, L. Ma, S. Tan, K. A. Beyer, F. Xu, E. Hu, H. L. Xin, *Adv. Energy Mater.* **2022**, *12*, 2201989.
- [24] Q. Liu, Z. Hu, M. Chen, C. Zou, H. Jin, S. Wang, Q. Gu, S. Chou, *J. Mater. Chem. A* **2019**, *7*, 9215.
